# Supplementary material for: Enhanced photocatalytic activities of visible-light driven green synthesis in water and environmental remediation on Au/Bi2WO6 hybrid nanostructures
Source: Royal Society of Chemistry journal article supplement (doi:10.1039/c4ra15349a), 2015-01-01
Supplement: c4ra15349a1.pdf [file c4ra15349a1.pdf]

## Electronic supplementary information

### Enhanced photocatalytic activities of visible-light driven green synthesis in water and environmental remediation on Au/Bi<sub>2</sub>WO<sub>6</sub> hybrid nanostructures

Juan Yang\*, Xiaohan Wang, Yumei Chen, Jun Dai\*, Shihao Sun

*Institute of Applied Chemistry, Henan Polytechnic University, Jiaozuo, 454003, P.R. China*

\*E-mail: [yangjuanhpu@yahoo.com](mailto:yangjuanhpu@yahoo.com), [daijun@hpu.edu.cn](mailto:daijun@hpu.edu.cn)

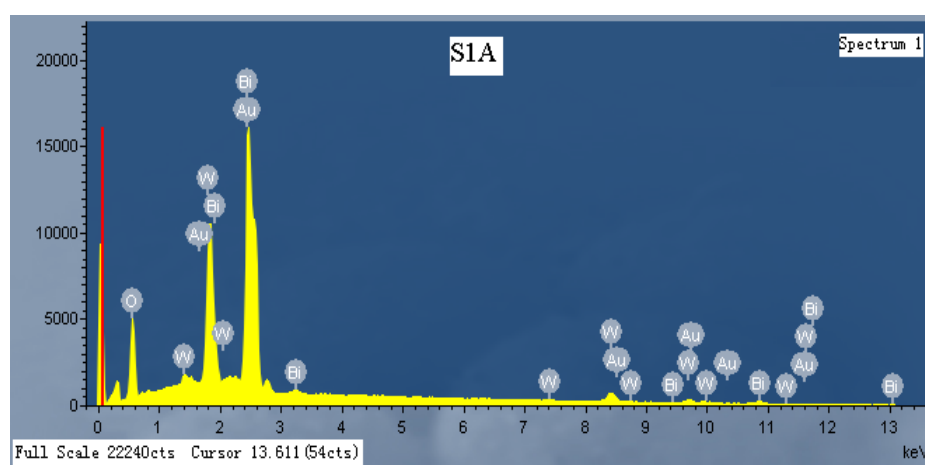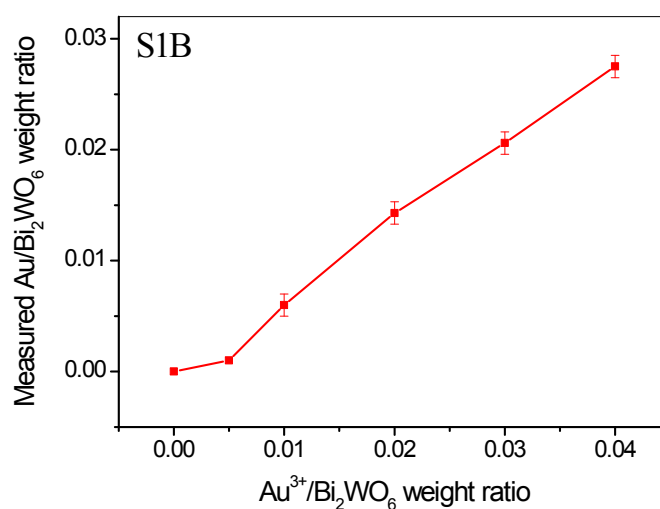

**Fig. S1A** Energy-dispersive X-ray (EDX) analysis of 3.0% Au/Bi<sub>2</sub>WO<sub>6</sub> hybrid nanoparticles; **S1B** Effect of the added Au<sup>3+</sup>/Bi<sub>2</sub>WO<sub>6</sub> weight ratio on the obtained Au/Bi<sub>2</sub>WO<sub>6</sub> weight ratio in the nanostructures measured by EDX analysis: Au/Bi<sub>2</sub>WO<sub>6</sub> ratio from EDX vs Au<sup>3+</sup>/Bi<sub>2</sub>WO<sub>6</sub> ratio.

**Table S1** Photocatalytic selective oxidation of various benzylic alcohols over 2.0% Au/Bi<sub>2</sub>WO<sub>6</sub> in water under visible light irradiation for 8 h.

| Entry | Substrate                                                                         | Product                                                                           | Conversion (%) | Selectivity of aldehyde (%) |
|-------|-----------------------------------------------------------------------------------|-----------------------------------------------------------------------------------|----------------|-----------------------------|
| 1     | 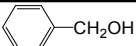 |  | 65.4           | 82                          |
| 2     |  |  | 69.5           | 80                          |
| 3     |  |  | 62.7           | 78                          |
| 4     |  |  | 64.5           | 71                          |
| 5     |  |  | 56.6           | 67                          |

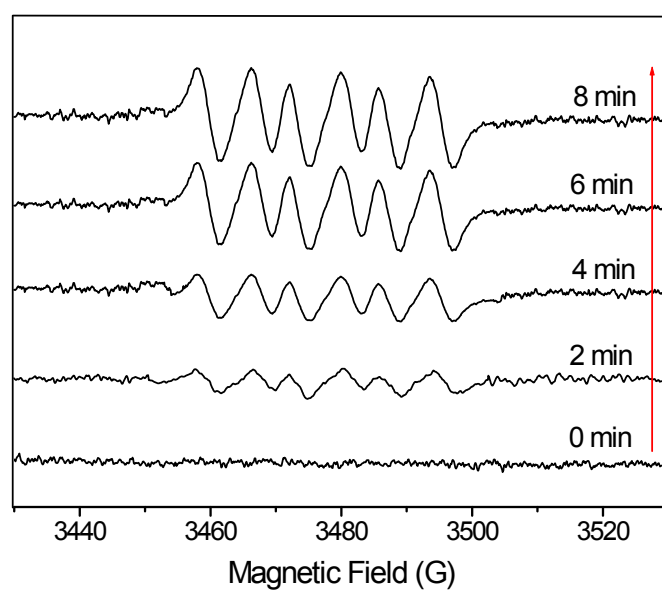

**Fig. S2** Electron spin resonance (ESR) spectra of superoxide radicals trapped by DMPO over 2.0% Au/Bi<sub>2</sub>WO<sub>6</sub> photocatalyst as a function of irradiation time in methanol solution.

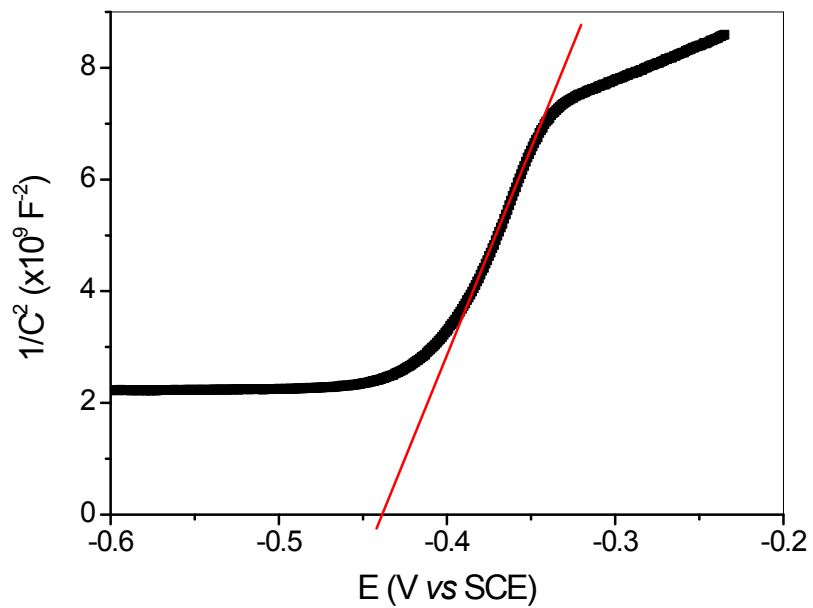

**Fig. S3** Mott-Schottky plot for  $\text{Bi}_2\text{WO}_6$  nanosheets in 0.5 mol/L  $\text{Na}_2\text{SO}_4$  aqueous solution (pH=6.8).

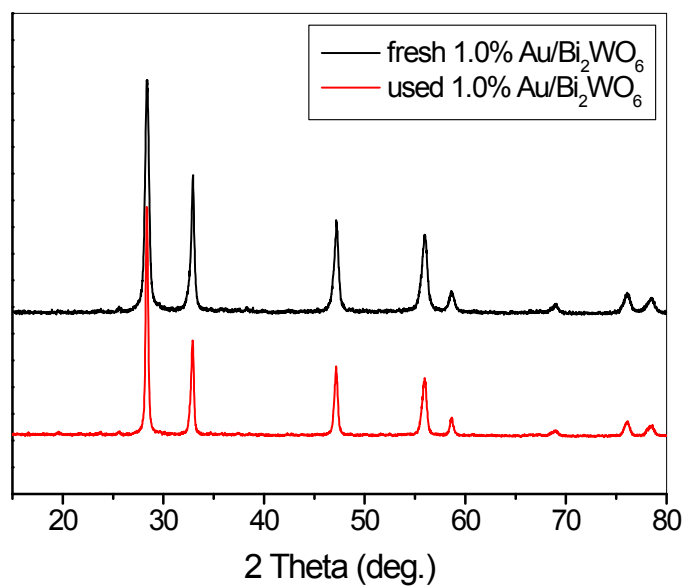

**Fig. S4** XRD patterns of fresh 1.0%  $\text{Au}/\text{Bi}_2\text{WO}_6$  and used 1.0%  $\text{Au}/\text{Bi}_2\text{WO}_6$  sample after five cycles of photocatalytic reduction of Cr(VI).

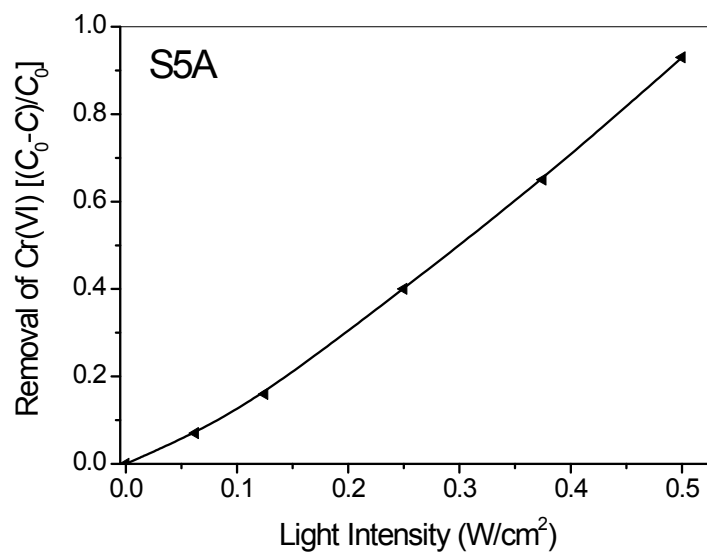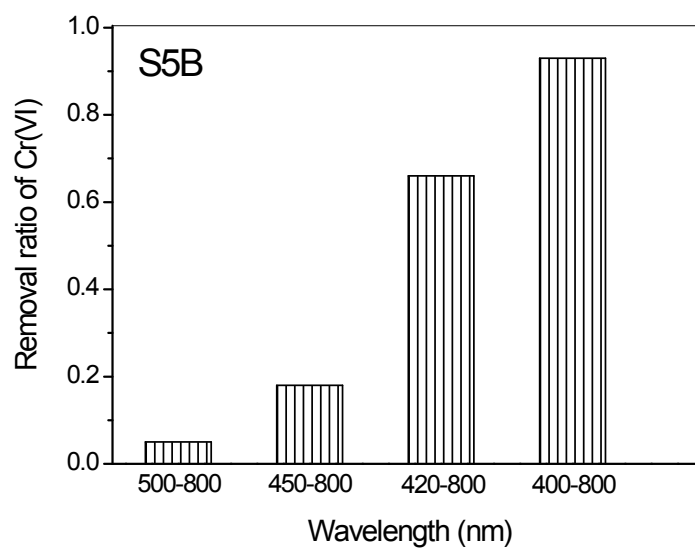

**Fig. S5** The influence of incident light intensity (A) and light wavelength range (B) on the photocatalytic reduction of Cr(VI) over 1.0% Au/Bi<sub>2</sub>WO<sub>6</sub> hybrid nanostructures.
